# Supplementary material for: Application of Bacteriophages on Shiga Toxin-Producing Escherichia coli (STEC) Biofilm
Source: MDPI journal article supplement (doi:10.3390/antibiotics10111423), 2021-11-20
Supplement: s1 [file s1]

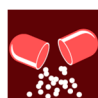

Supplementary Table S1. Average of OD value. \*Dev St is for standard deviation. \*CONTROL: refers to the bacterial strain cultivation without any phage addition. \*\*% of reduction: calculated as the overall MOI average out of each bacterial control.

|                  |            | ATCC 25404 | Dev St* | CNCTC 6246 | Dev St* | C679-12 | Dev St* | ED56   | Dev St* | ED33   | Dev St* | ED226 | Dev St* |
|------------------|------------|------------|---------|------------|---------|---------|---------|--------|---------|--------|---------|-------|---------|
| MOI 1            | LF2        | 0.146      | 0.014   | 0.127      | 0.003   | 0.222   | 0.018   | 0.223  | 0.048   | 0.177  | 0.028   | 0.228 | 0.02    |
|                  | FM9        | 0.144      | 0.005   | 0.125      | 0.009   | 0.188   | 0.01    | 0.233  | 0.025   | 0.185  | 0.014   | 0.199 | 0.017   |
|                  | FM10       | 0.147      | 0.011   | 0.121      | 0.002   | 0.113   | 0.005   | 0.189  | 0.023   | 0.197  | 0.013   | 0.186 | 0.013   |
|                  | DP16       | 0.157      | 0.011   | 0.124      | 0.002   | 0.177   | 0.015   | 0.19   | 0.009   | 0.164  | 0.018   | 0.144 | 0.011   |
|                  | DP17       | 0.139      | 0.01    | 0.124      | 0.002   | 0.165   | 0.019   | 0.235  | 0.061   | 0.178  | 0.017   | 0.159 | 0.026   |
|                  | DP19       | 0.159      | 0.015   | 0.13       | 0.007   | 0.15    | 0.006   | 0.194  | 0.01    | 0.197  | 0.034   | 0.168 | 0.026   |
|                  | Cocktail 1 | 0.149      | 0.004   | 0.125      | 0.005   | 0.133   | 0.007   | 0.182  | 0.006   | 0.178  | 0.011   | 0.131 | 0.016   |
|                  | Cocktail 2 | 0.14       | 0.006   | 0.131      | 0.007   | 0.146   | 0.013   | 0.199  | 0.019   | 0.192  | 0.015   | 0.148 | 0.011   |
| MOI 2            | LF2        | 0.164      | 0.005   | 0.15       | 0.058   | 0.292   | 0.022   | 0.283  | 0.028   | 0.207  | 0.014   | 0.258 | 0.005   |
|                  | FM9        | 0.161      | 0.007   | 0.12       | 0.004   | 0.341   | 0.011   | 0.29   | 0.031   | 0.186  | 0.009   | 0.193 | 0.009   |
|                  | FM10       | 0.157      | 0.02    | 0.133      | 0.015   | 0.285   | 0.006   | 0.231  | 0.023   | 0.246  | 0.016   | 0.186 | 0.04    |
|                  | DP16       | 0.138      | 0.006   | 0.121      | 0.004   | 0.287   | 0.016   | 0.258  | 0.013   | 0.193  | 0.022   | 0.233 | 0.017   |
|                  | DP17       | 0.125      | 0.003   | 0.118      | 0.004   | 0.262   | 0.005   | 0.276  | 0.018   | 0.192  | 0.004   | 0.161 | 0.007   |
|                  | DP19       | 0.161      | 0.007   | 0.149      | 0.006   | 0.286   | 0.01    | 0.218  | 0.012   | 0.2    | 0.02    | 0.27  | 0.023   |
|                  | Cocktail 1 | 0.155      | 0.01    | 0.131      | 0.01    | 0.296   | 0.016   | 0.234  | 0.02    | 0.183  | 0.004   | 0.291 | 0.017   |
|                  | Cocktail 2 | 0.125      | 0.005   | 0.129      | 0.001   | 0.298   | 0.037   | 0.231  | 0.006   | 0.169  | 0.008   | 0.126 | 0.01    |
| MOI 10           | LF2        | 0.148      | 0.023   | 0.13       | 0.007   | 0.269   | 0.032   | 0.188  | 0.018   | 0.187  | 0.015   | 0.164 | 0.003   |
|                  | FM9        | 0.121      | 0.003   | 0.129      | 0.007   | 0.284   | 0.058   | 0.185  | 0.012   | 0.187  | 0.011   | 0.166 | 0.006   |
|                  | FM10       | 0.139      | 0.015   | 0.123      | 0.008   | 0.145   | 0.039   | 0.158  | 0.012   | 0.213  | 0.023   | 0.204 | 0.016   |
|                  | DP16       | 0.126      | 0.008   | 0.114      | 0.002   | 0.329   | 0.013   | 0.214  | 0.005   | 0.183  | 0.003   | 0.194 | 0.026   |
|                  | DP17       | 0.122      | 0.005   | 0.114      | 0.001   | 0.212   | 0.076   | 0.191  | 0.029   | 0.175  | 0.009   | 0.169 | 0.006   |
|                  | DP19       | 0.152      | 0.017   | 0.117      | 0.003   | 0.29    | 0.068   | 0.159  | 0.004   | 0.18   | 0.016   | 0.178 | 0.027   |
|                  | Cocktail 1 | 0.12       | 0.005   | 0.118      | 0.002   | 0.128   | 0.002   | 0.169  | 0.017   | 0.184  | 0.008   | 0.13  | 0.013   |
|                  | Cocktail 2 | 0.12       | 0.001   | 0.12       | 0.004   | 0.134   | 0.006   | 0.178  | 0.001   | 0.178  | 0.01    | 0.127 | 0.002   |
| MOI 100          | LF2        | 0.158      | 0.005   | 0.124      | 0.004   | 0.149   | 0.031   | 0.199  | 0.01    | 0.162  | 0.007   | 0.187 | 0.011   |
|                  | FM9        | 0.129      | 0.008   | 0.11       | 0.003   | 0.126   | 0.022   | 0.218  | 0.01    | 0.162  | 0.004   | 0.176 | 0.009   |
|                  | FM10       | 0.137      | 0.012   | 0.117      | 0.008   | 0.122   | 0.007   | 0.167  | 0.005   | 0.151  | 0.005   | 0.192 | 0.008   |
|                  | DP16       | 0.131      | 0.002   | 0.112      | 0.013   | 0.117   | 0.005   | 0.185  | 0.013   | 0.152  | 0.008   | 0.187 | 0.025   |
|                  | DP17       | 0.125      | 0.004   | 0.119      | 0.002   | 0.136   | 0.033   | 0.193  | 0.022   | 0.157  | 0.011   | 0.189 | 0.002   |
|                  | DP19       | 0.133      | 0.024   | 0.125      | 0.001   | 0.139   | 0.004   | 0.168  | 0.009   | 0.162  | 0.005   | 0.196 | 0.024   |
|                  | Cocktail 1 | 0.127      | 0.013   | 0.119      | 0.005   | 0.126   | 0.006   | 0.171  | 0.005   | 0.161  | 0.005   | 0.168 | 0.013   |
|                  | Cocktail 2 | 0.127      | 0.002   | 0.127      | 0.009   | 0.136   | 0.005   | 0.172  | 0.009   | 0.163  | 0.009   | 0.158 | 0.018   |
| Average          |            | 0.139      | 0.007   | 0.124      | 0.004   | 0.171   | 0.013   | 0.1935 | 0.0125  | 0.1815 | 0.011   | 0.182 | 0.013   |
| CONTROL*         |            | 0.287      | 0.079   | 0.388      | 0.019   | 0.334   | 0.072   | 0.134  | 0.003   | 0.443  | 0.031   | 0.24  | 0.025   |
| % of reduction** |            | 51.57      |         | 68.04      |         | 48.80   |         | -44.40 |         | 59.03  |         | 24.17 |         |
